# Supplementary material for: EGFR tyrosine kinase activity and Rab GTPases coordinate EGFR trafficking to regulate macrophage activation in sepsis
Source: PubMed Central journal article supplement (PMC9640671; doi:10.1038/s41419-022-05370-y), 2022-11-07
Supplement: 41419_2022_5370_MOESM8_ESM.pdf [file 41419_2022_5370_MOESM8_ESM.pdf]

**Supplementary Figs | Uncropped western blot images of the indicated Figures.**

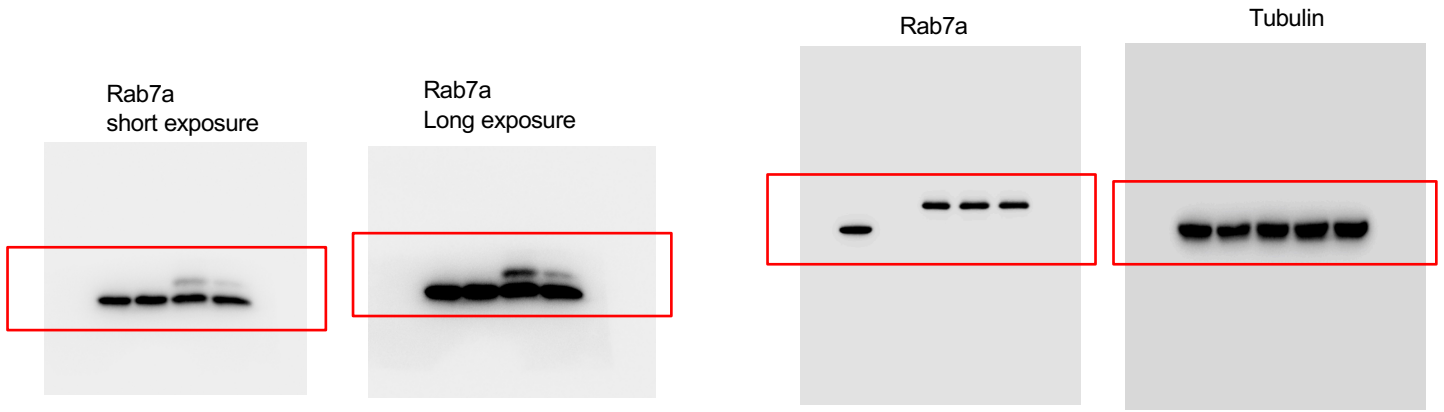

Full unedited gel for Figure 2B

Full unedited gel for Figure 2c

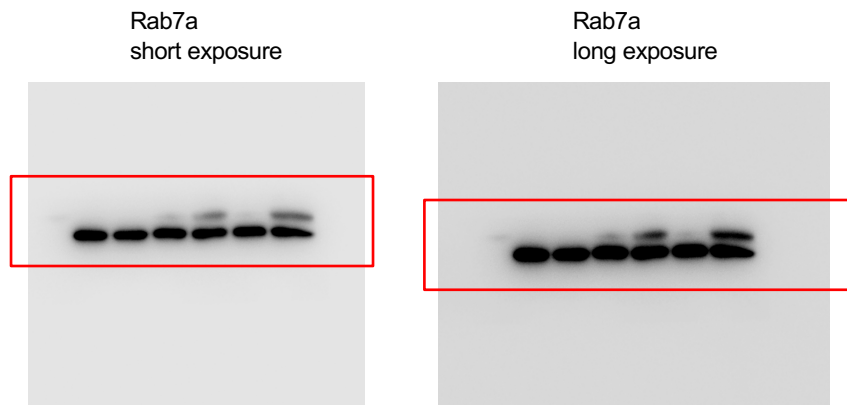

Full unedited gel for Figure 2D

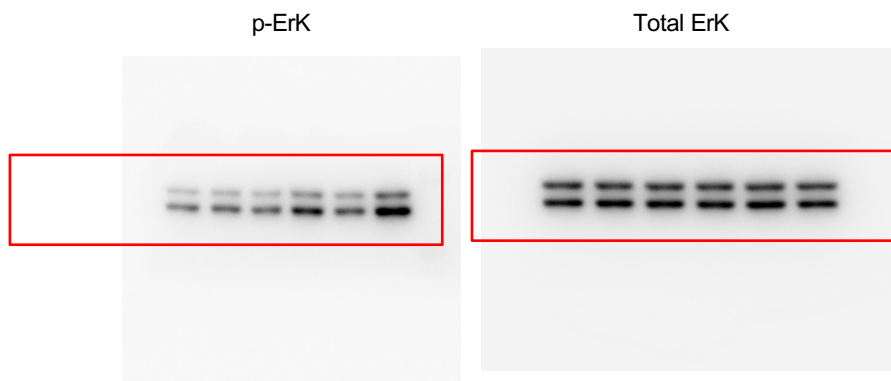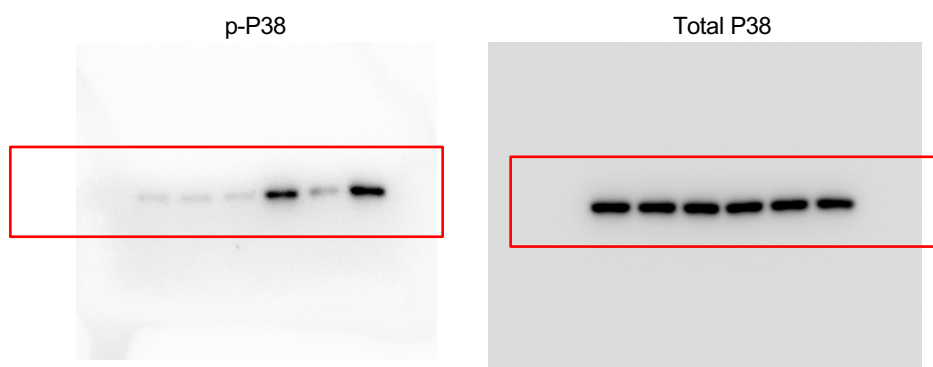

Full unedited gel for Figure 2J

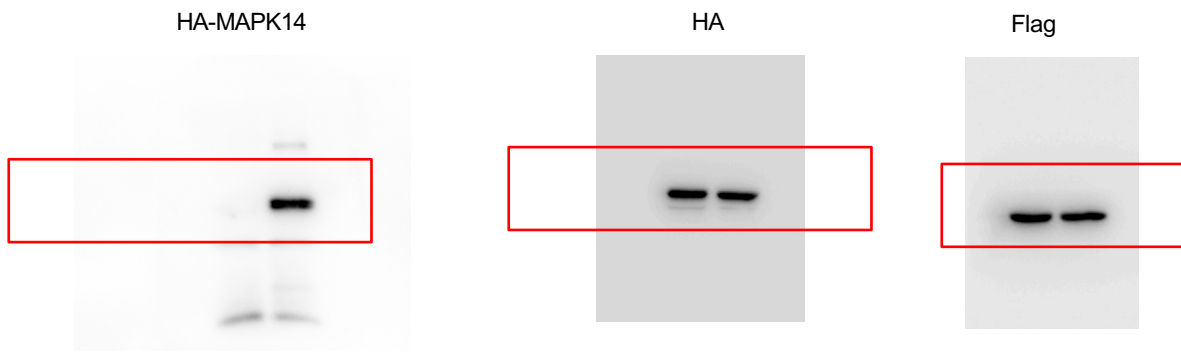

Full unedited gel for Figure 3B

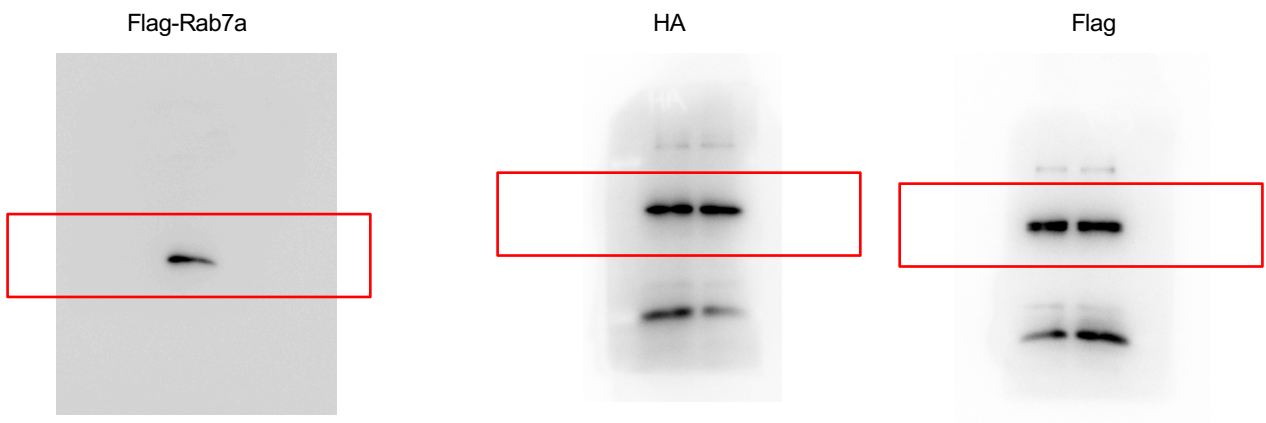

Full unedited gel for Figure 3C

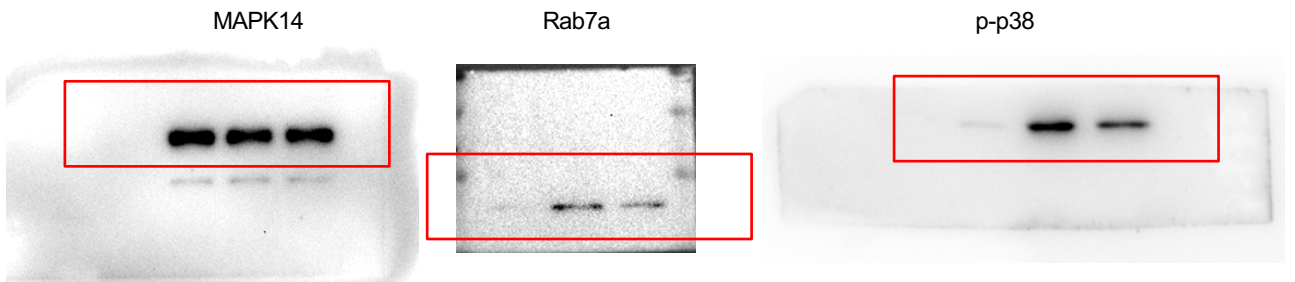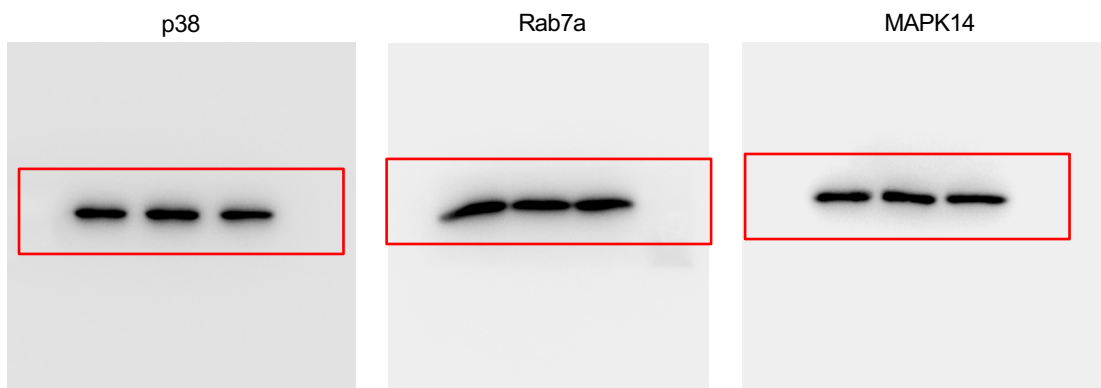

Full unedited gel for Figure 3D

Rab7a  
(short exposure)

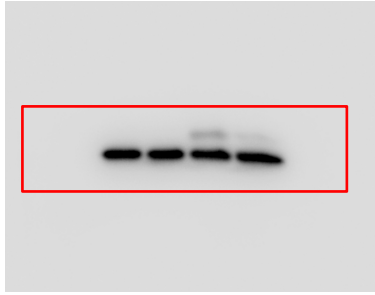

Rab7a  
(Long exposure)

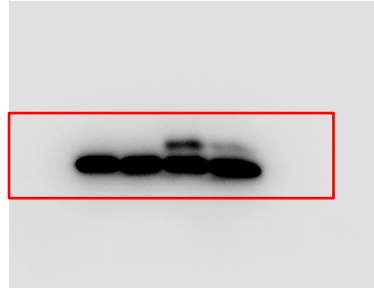

Full unedited gel for Figure 3E

Rab7a  
(short exposure)

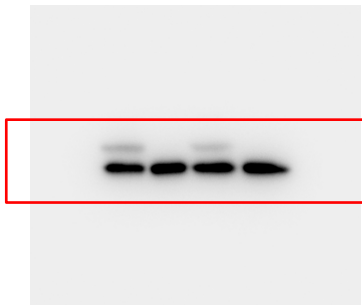

Rab7a  
(Long exposure)

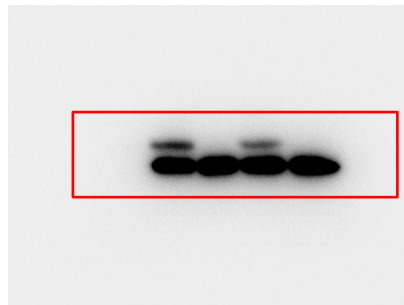

FLAG

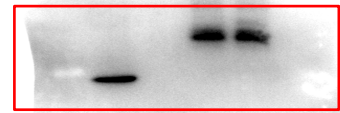

Full unedited gel for Figure 3F

IB : Rab7a  
(short exposure)

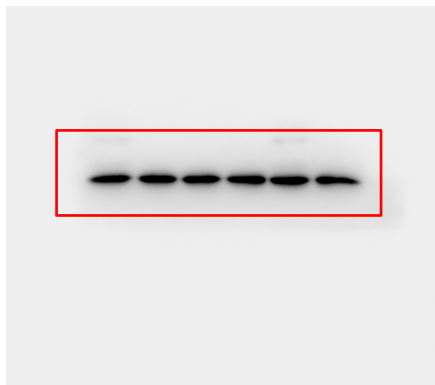

Rab7a  
(Long exposure)

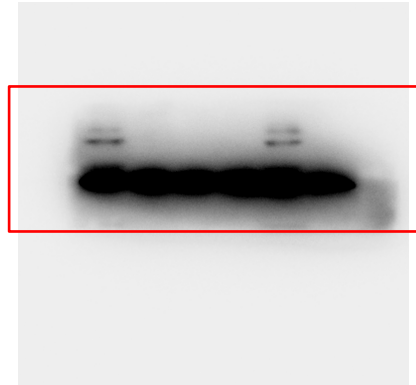

Flag

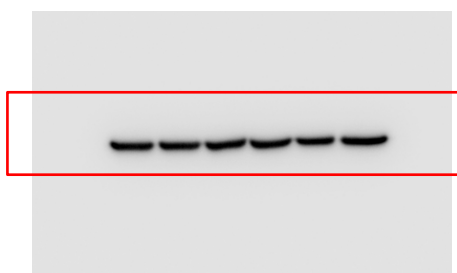

HA

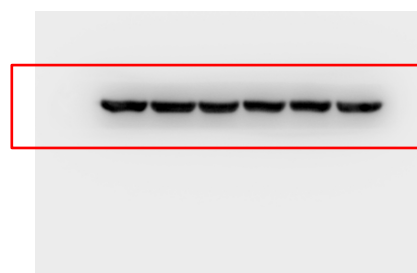

Full unedited gel for Figure 3G

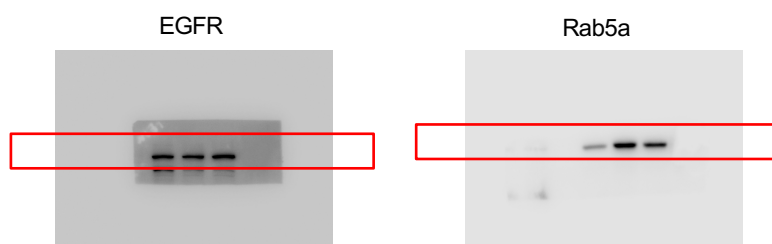

Full unedited gel for Figure 4C

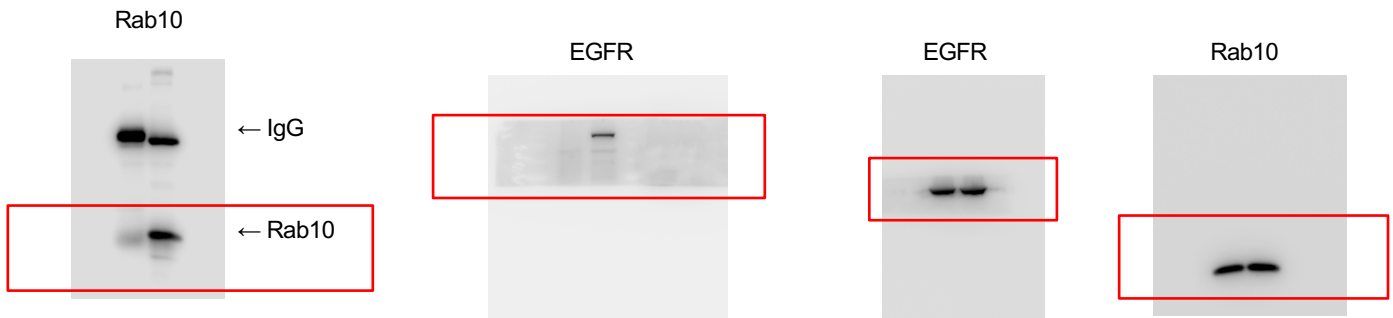

Full unedited gel for Figure 5C

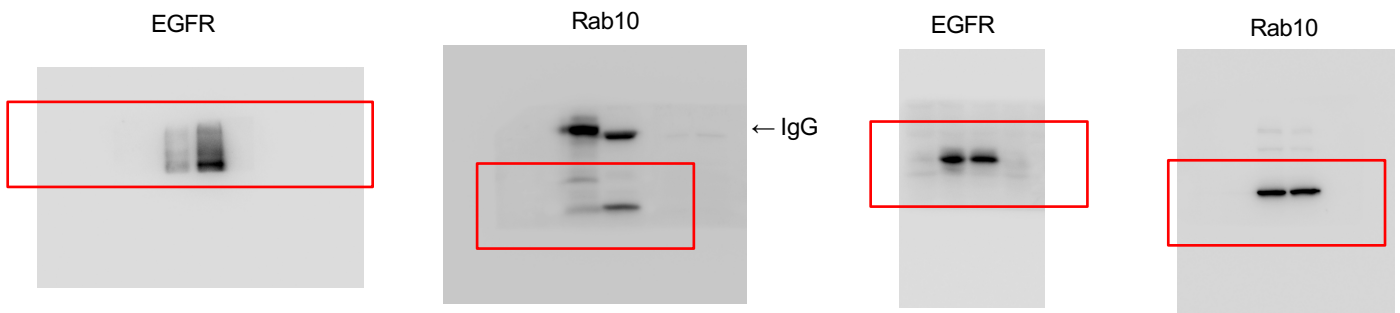

Full unedited gel for Figure 5D

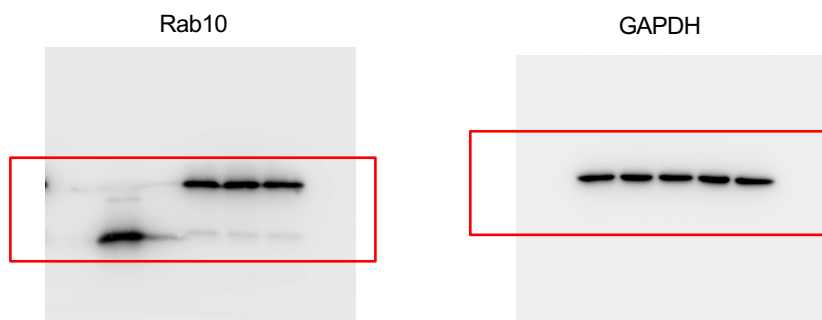

Full unedited gel for Figure 5G

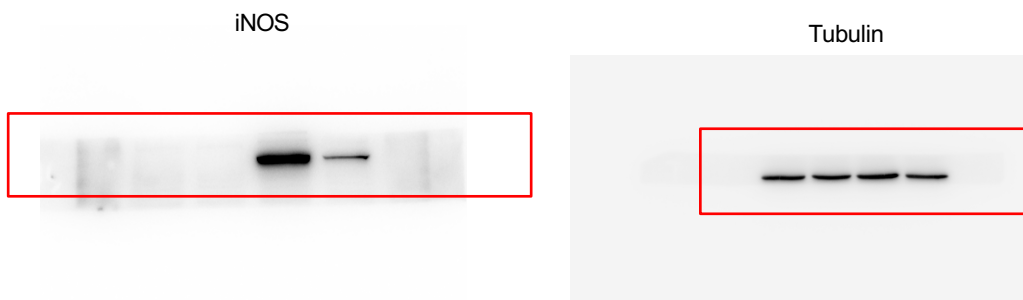

Full unedited gel for Figure 6B

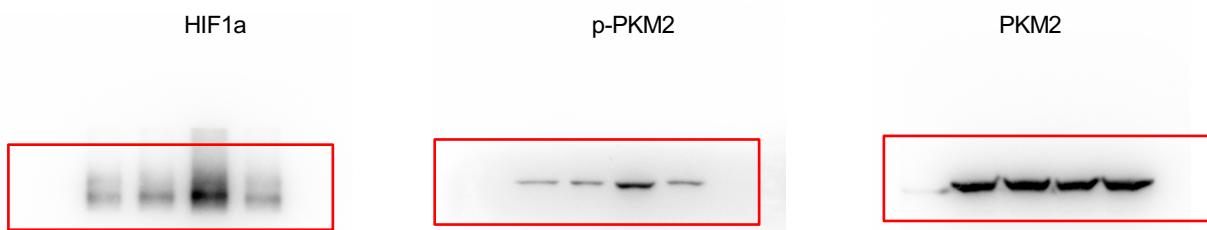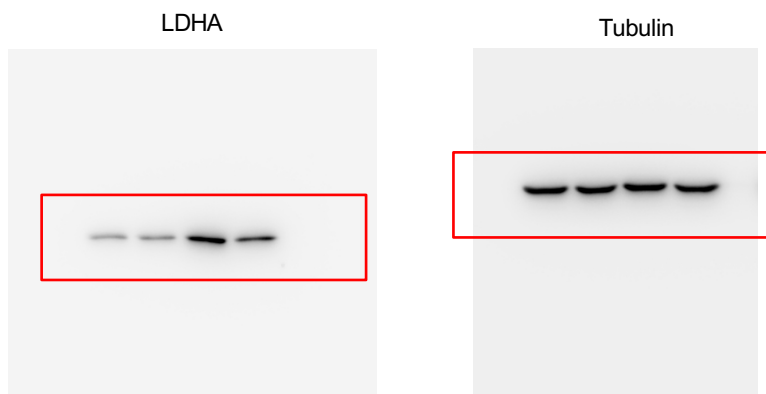

Full unedited gel for Figure 6M

Fig. 7

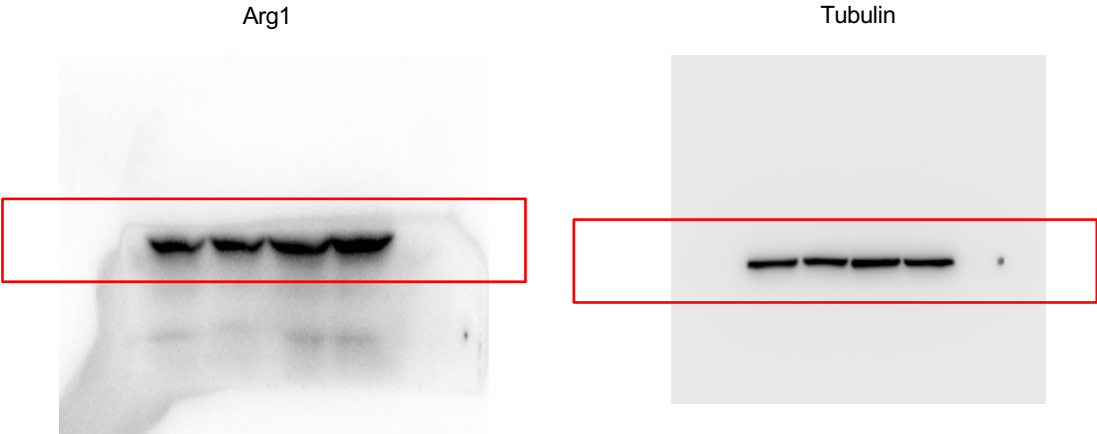

Full unedited gel for Figure 7C

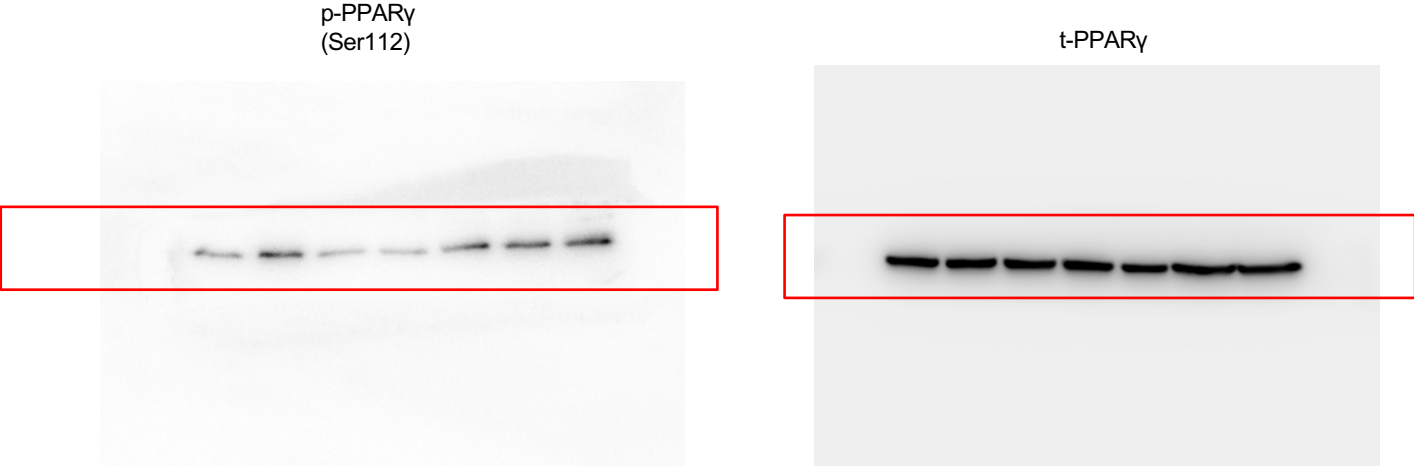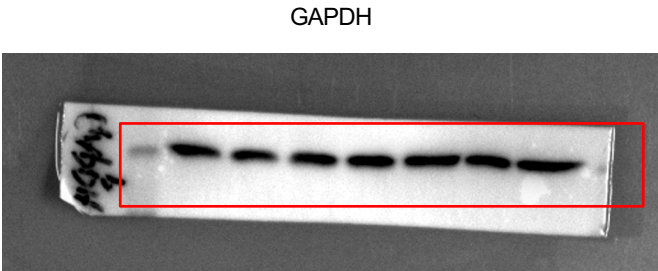

Full unedited gel for Figure 7J



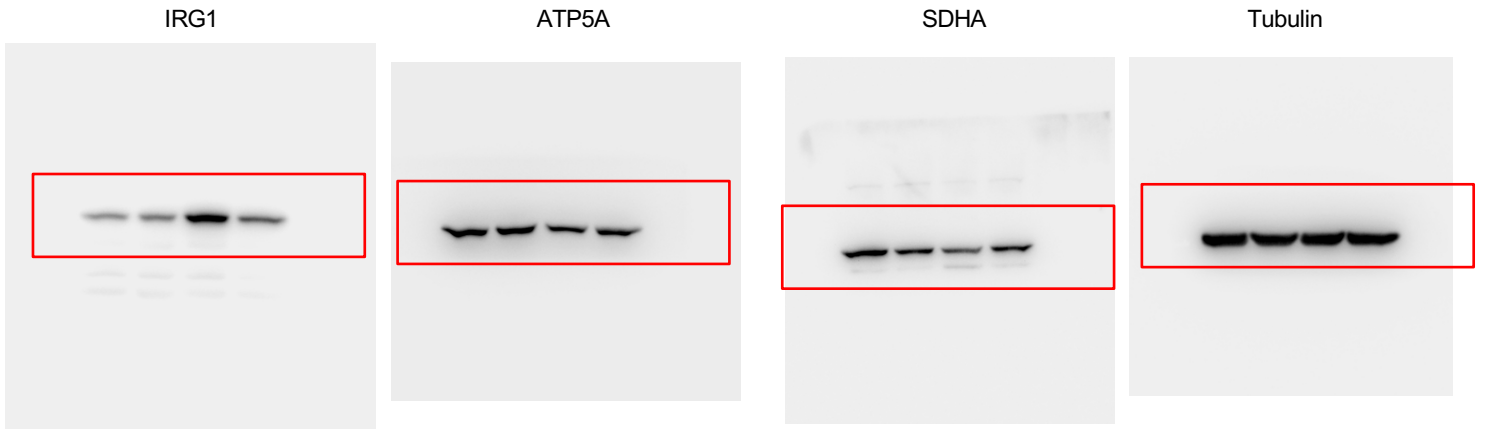

Full unedited gel for Figure 7U

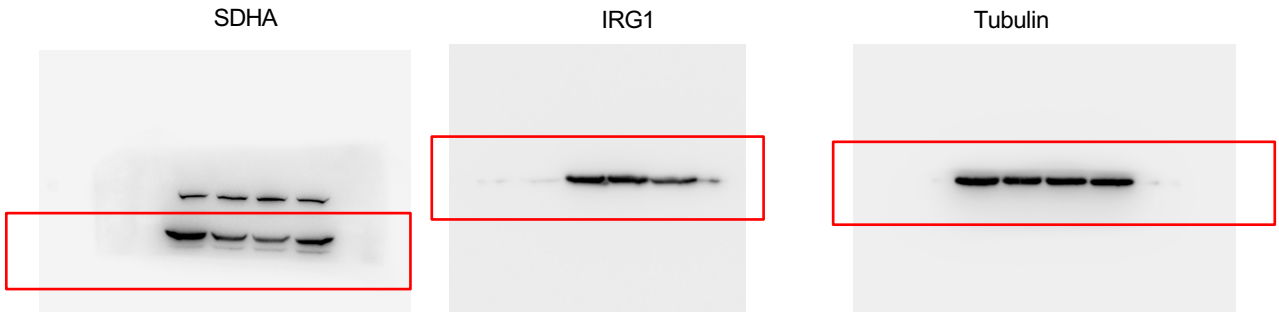

Full unedited gel for Figure 7V

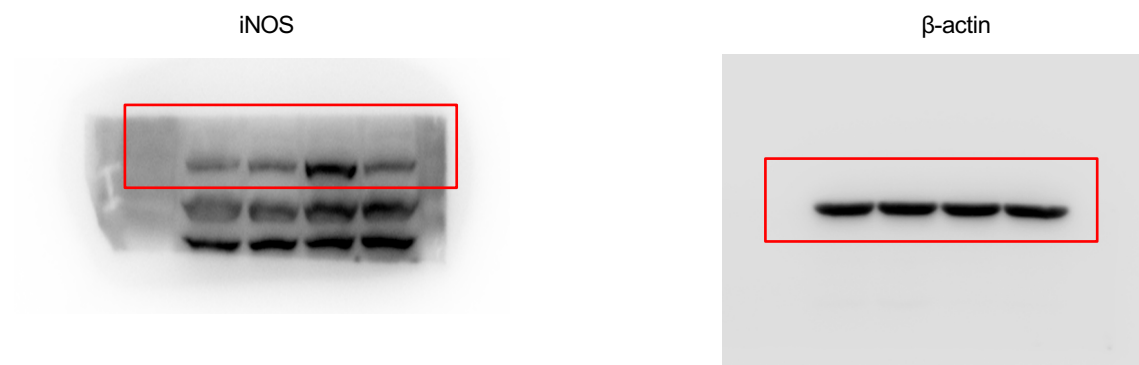

Full unedited gel for Figure S2B

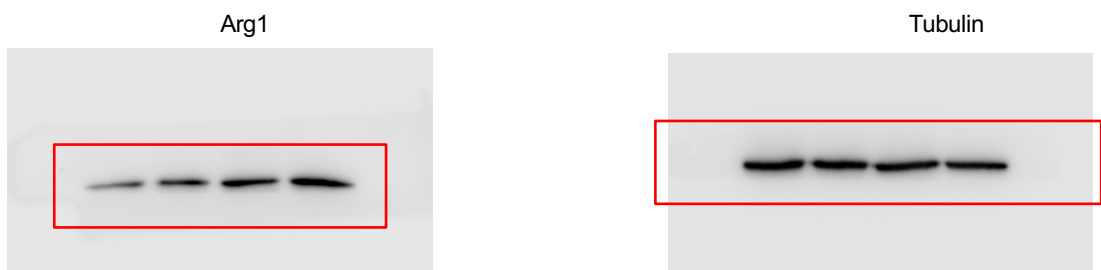

Full unedited gel for Figure S3B

iNOS

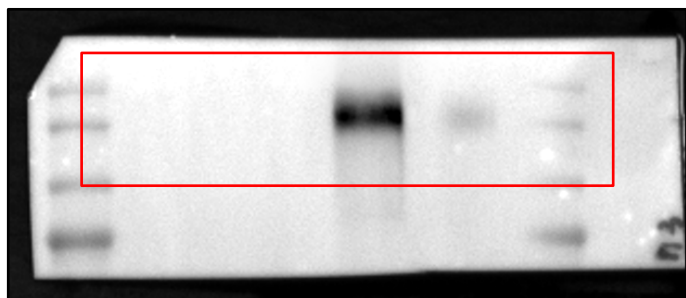

$\beta$ -actin

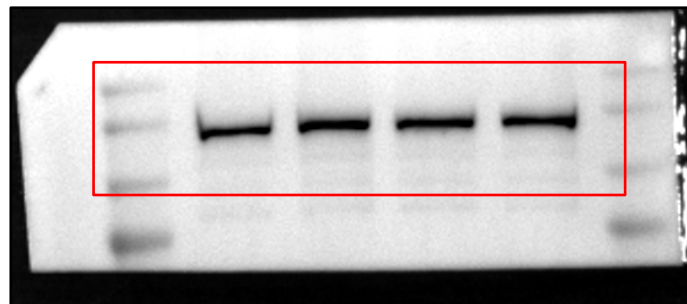

Tubulin

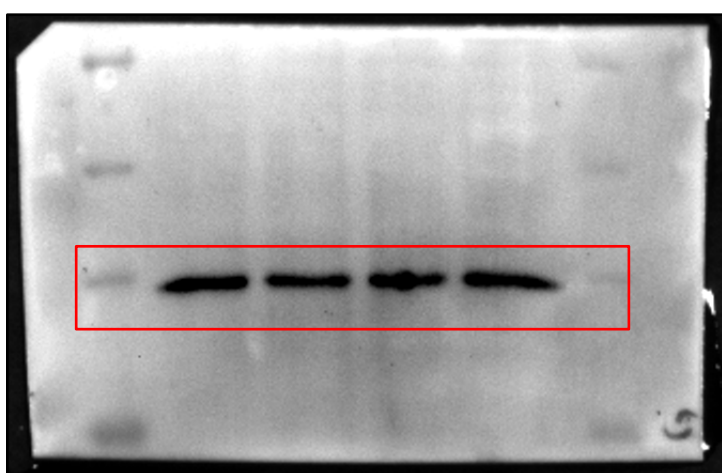

Full unedited gel for Figure S4A

EGFR

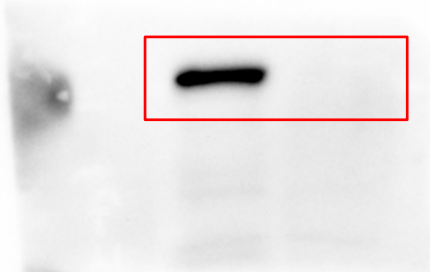

Tubulin

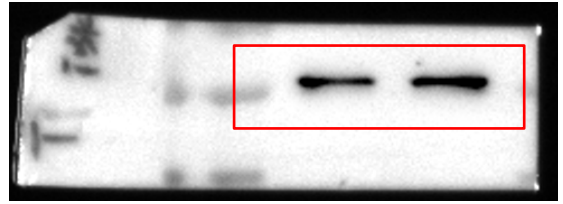

Full unedited gel for Fig S5B
